# Supplementary material for: Biochar Obtained from Caryocar brasiliense Endocarp for Removal of Dyes from the Aqueous Medium
Source: MDPI journal article supplement (doi:10.3390/ma15249076), 2022-12-19
Supplement: s1 [file s1]

# Biochar Obtained from *Caryocar brasiliense* Endocarp for Removal of Dyes from the Aqueous Medium

André L. F. C. Melo <sup>1</sup>, Marcelo T. Carneiro <sup>1</sup>, Ariane M. S. S. Nascimento <sup>2</sup>, Alan I. S. Moraes <sup>2</sup>, Roosevelt D. S. Bezerra <sup>3</sup>, Bartolomeu C. Viana <sup>2</sup>, Josy A. Osajima <sup>2</sup> and Edson C. Silva-Filho <sup>2,\*</sup>

<sup>1</sup> Federal Institute of Piauí, Floriano Campus, Floriano 64808-475, PI, Brazil

<sup>2</sup> Interdisciplinary Laboratory for Advanced Materials, Teresina 64049-550, PI, Brazil

<sup>3</sup> Federal Institute of Piauí, Teresina-Central Campus, Teresina 64000-040, PI, Brazil

\* Correspondence: edsonfilho@ufpi.edu.br

## Supplementary Material

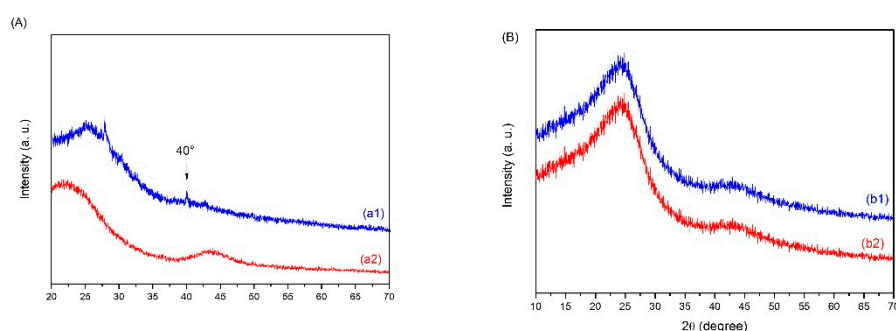

**Figure S1.** XRD for the studied samples of biochar of endocarp (BE) (a1) and activated biochar of the endocarp (ABE) (a2) (A); XRD pattern for the materials BE (b1) and ABE (b2) (B).

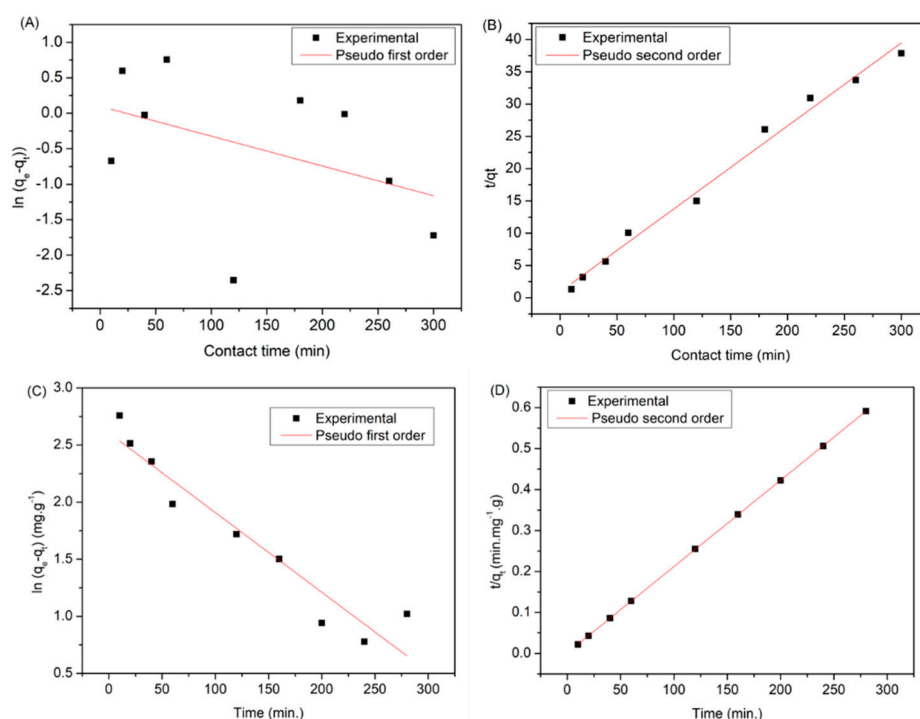

**Figure S2.** Adjustment to the kinetic model of pseudo-first-order (A) and pseudo-second-order (B) of biochar (BE); Fit to the kinetic model of pseudo-first-order (C) and pseudo-second-order (D) of biochar (ABE)

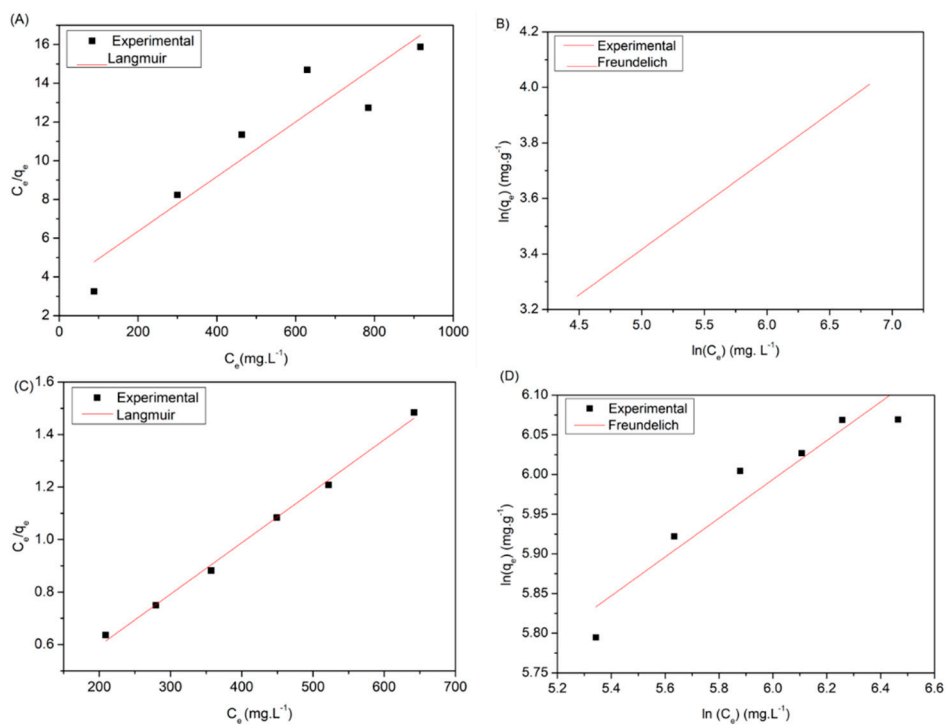

**Figure S3.** Adjustment to the isothermal model of Langmuir (A) and Freundlich (B) of biochar (BE); Fit to the isothermal model of biochar Langmuir (C) and Freundlich (D) (ABE).
